# Supplementary material for: Rational molecular design of phenanthroimidazole-based fluorescent materials towards high-efficiency non-doped deep blue OLEDs
Source: Royal Society of Chemistry journal article supplement (doi:10.1039/d2tc02329f), 2022-01-01
Supplement: d2tc02329f1.pdf [file d2tc02329f1.pdf]

## Supporting Information

# Rational Molecular Design of Phenanthroimidazole-Based Fluorescent Materials towards High-Efficiency Non-Doped Deep Blue OLEDs

Chunya Du,<sup>a</sup> Tong Lu,<sup>a</sup> Zhuang Cheng,<sup>a</sup> Yulei Chang,<sup>b</sup> Hui Liu,<sup>c</sup> Jun Wang,<sup>d</sup> Liang Wan,<sup>a</sup> Ying Lv<sup>b</sup> and Ping Lu<sup>\*, a</sup>

<sup>a</sup> State Key Laboratory of Supramolecular Structure and Materials, Department of Chemistry, Jilin University, Changchun 130012, China.

<sup>b</sup> State Key Laboratory of Luminescence and Applications, Changchun Institute of Optics, Fine Mechanics and Physics, Chinese Academy of Sciences, Changchun 130033, China

<sup>c</sup> College of Optoelectronic Engineering, Chengdu University of Information Technology, Chengdu 610225, China;

<sup>d</sup> National & Local Joint Engineering Laboratory for Synthesis Technology of High Performance Polymer, Key Laboratory of High Performance Plastics, Ministry of Education, College of Chemistry, Jilin University, Qianjin Street 2699, Changchun, 130012, P. R. China

\*Corresponding author: [lup@jlu.edu.cn](mailto:lup@jlu.edu.cn)

## Table of Contents

|                                                  |            |
|--------------------------------------------------|------------|
| <b>1. Experimental Section</b> .....             | <b>S2</b>  |
| <b>2. Synthesis and Characterization</b> .....   | <b>S6</b>  |
| <b>3. Single crystal X-ray diffraction</b> ..... | <b>S9</b>  |
| <b>4. Theoretical Calculations</b> .....         | <b>S10</b> |
| <b>5. Photophysical Properties</b> .....         | <b>S11</b> |
| <b>6. Electrochemical Property</b> .....         | <b>S14</b> |
| <b>7. Electroluminescence Property</b> .....     | <b>S14</b> |

# 1. Experimental Section

## General Methods

The materials employed in this paper and all the solvents and reagents used for synthesis and measurements were purchased from commercial suppliers without further purification unless otherwise stated. The mass spectra were tested using MALDI-TOF-MS method with AXIMA-CFRM plus instruments. The NMR data were recorded on a Bruker AVANCE 500 spectrometer at 500 MHz, and the tests used tetramethylsilane (TMS) as internal standard and DMSO-D<sub>6</sub> as solvents. Elemental analysis was finished on a Flash EA 1112, CHNS-O elemental analysis instrument. Single crystal X-ray diffraction intensity data were collected at room temperature on a Rigaku R-Axis RAPID diffractometer using the  $\omega$ -scan mode with graphite-monochromated Mo K $\alpha$  radiation (0.71073 Å). The crystal structures were solved with direct methods and refined with a full-matrix least-squares technique using the SHELXS programs. All angles and distances in crystals were measured using Mercury 1.4.1 Software. Thermal gravimetric analysis (TGA) data were collected from a Perkin-Elmer thermal analysis system under nitrogen protection (30 to 800 °C), the heating rate is 10 K min<sup>-1</sup>. Differential scanning calorimetry (DSC) was measured on a NETZSCH (DSC-204) unit from 30 to 360 °C at a heating rate of 10 K min<sup>-1</sup> with nitrogen atmosphere. The electrochemical properties were performed via cyclic voltammetry (CV) measurements. The tests used a standard one-compartment, three-electrode electrochemical cell given by a BAS 100 B/W electrochemical analyzer, where tetrabutylammoniumhexafluorophosphate (TBAPF<sub>6</sub>) in anhydrous dimethyl formamide (DMF) or anhydrous dichloromethane with the concentration of 0.1 M were used as the electrolytes for negative or positive scans to calculate the oxidation and reduction potentials of the materials. The resulting HOMO/LUMO values are calculated according to the equation: (unit: eV)

$$E_{\text{HOMO}} = -(E_{\text{ox}} \text{ vs. Fc/Fc}^+ + 4.8)$$

**Equation S1**

$$E_{\text{LUMO}} = -(E_{\text{red}} \text{ vs. Fc/Fc}^+ + 4.8)$$

**Equation S2**

## Photophysical Measurement

UV-vis, fluorescence spectra and PLQY ( $\Phi_F$ ) were recorded on a Shimadzu UV-3100 spectrophotometer using 1 cm path length quartz cells. Photoluminescence tests were measured by FLS920 spectrophotometer with steady and transient modes. PL spectra are obtained with a Xenon light source and further fluorescence lifetimes were measured using a 280 nm picosecond pulsed light emitting diode excitation source. The  $\Phi_F$  of different solutions were determined by using quinine sulfate as a reference ( $\Phi_F = 0.546$ ) and were calculated by using the following formula:

$$Q_x = Q_r \left( \frac{A_r(\lambda_r)}{A_x(\lambda_x)} \right) \left( \frac{I(\lambda_r)}{I(\lambda_x)} \right) \left( \frac{n_x^2}{n_r^2} \right) \left( \frac{D_x}{D_r} \right)$$

**Equation S3**

Where  $Q$  is the PLQY,  $A$  is the value of absorbance,  $I$  is the intensity of excitation source,  $n$  is the refractive index of solvent,  $D$  is the area of emission spectra,  $\lambda$  is the corresponding wavelength. The subscript  $r$  stands for the reference while  $x$  stands for test subject. The excitation wavelength was 330 nm for PPI-2-DMF, PPI-2-DPF and PPI-3-SBF.

The  $k_r$  and  $k_{nr}$  mentioned are calculated according to the equations:

$$k_r = \frac{\Phi}{\tau}$$

**Equation S4**

$$k_{nr} = \frac{1 - \Phi}{\tau}$$

**Equation S5**

where  $\phi$  is the PLQY measured by a integrating sphere attachment of FLS920 spectrophotometer,  $\tau$  is the corresponding lifetimes of the emitters.

To determine emitting dipole orientation of an emitting film, angle-resolved and polarization-resolved PL measurements were performed. The sample consisted of a silica substrate with the 30-nm thick neat film. The sample was attached to a half quartz cylinder prism by index matching liquid. The excitation of the samples was performed with the 325-nm line of the continuous-wave He: Cd laser with a fixed excitation angle

of 45°. The emission angle was changed by use of an automatic rotation stage. The spectra were resolved by utilization of a p-polarizing filter and measured by a fiber optical spectrometer. The angle-dependent p-polarized emission intensity at the peak wavelength of the PL spectrum of the emitting layer was detected. The emitting dipole orientation ( $\Theta_{//}$ ) was then determined by least-square fitting of the measured angle dependent p-polarized emission intensity with calculated results.

### Lippert-Mataga calculation

$$hc(\nu_a - \nu_f) = hc(\nu_a^0 - \nu_f^0) - \frac{2(\mu_e - \mu_g)^2}{a^3} f(\epsilon, n)$$

**Equation S6**

$f$  is the orientational polarizability of the solvent, corresponds to the Stokes shifts when  $f$  is zero,  $\mu_e$  is the excited state dipole moment,  $\mu_g$  is the ground-state dipole moment;  $a$  is the solvent cavity (Onsager) radius, derived from the Avogadro number ( $N$ ), molecular weight ( $M$ ), and density ( $d = 1.0 \text{ g/cm}^3$ );  $\epsilon$  and  $n$  are the solvent dielectric and the solvent refractive index, respectively;  $a$  and  $f(\epsilon, n)$  can be calculated respectively as follows:

$$f(\epsilon, n) = \frac{\epsilon - 1}{2\epsilon + 1} - \frac{n^2 - 1}{2n^2 + 1}$$

**Equation S7**

$$a = (3M/4N\pi l)^{1/3}$$

**Equation S8**

The detailed data are listed in Table S2~S3. The Stokes shift ( $\nu_a - \nu_f$ ) of PPI-2-DMF, PPI-2-DPF and PPI-3-SBF are in linear relationship with the solvent polarity  $f$  as presented in Fig. 3c.

### Device Fabrication

The purchased ITO glass was used as the substrate after carefully cleaned with isopropyl alcohol, acetone, toluene and deionized water, then go through drying

procedure at 120 °C in an oven and UV-zone treatment. The sheet resistance of the ITO glass is 20  $\Omega$  square<sup>-1</sup>. The prepared ITO glasses were transfer to the deposition system in the glove box with vacuum condition. All the organic layers were deposited at a rate of 1.0  $\text{\AA}$  s<sup>-1</sup>, the deposition rate for cathode LiF and the capping Al metal layer were 0.1 and 4.0  $\text{\AA}$  s<sup>-1</sup>. The electroluminescent (EL) characteristics were measured under ambient condition at room temperature, using a Keithley 2400 programmable electrometer and CS-200 chromameter. EL spectra are collected on a PR-650 Spectroscan spectrometer.

$$EQE = (\gamma \times \eta_r \times \eta_{PL}) \times \eta_{out}$$

**Equation S9**

where  $\eta_{PL}$  is the PLQY of the emitters in corresponding solid state;  $\gamma$  is the charge recombination factor of the devices which is approximately equal to 1 if the device is best optimized considering that the injected holes and electrons are balanced and completely recombined to form excitons;  $\eta_{out}$  is the light out-coupling efficiency which is estimated as 20-30 % according to the emitting region;  $\eta_r$  is the efficiency of radiative exciton production.

The transient EL decay was tested by an Agilent 8114A pulse generator (100 V/2 A) to generate rectangular pulse voltages. The pulse repetition rate was 500 Hz with the width of 500  $\mu$ s. The EL signal was detected using a lens coupled with the optical fiber connected to a Hamamatsu photomultiplier (H10721-20) with time resolution of 0.57 ns. The photomultiplier was connected to one of the channels of a digital oscilloscope (Tektronix DPO5204B, sampling rate: 10 GS s<sup>-1</sup>; resolution: 100  $\mu$ V) with 50  $\Omega$  input resistance.

### **Theoretical Calculation Method**

The ground-state ( $S_0$ ) geometries were optimized at the B3LYP/6-31G(d, p) level, and the HOMO/LUMO distributions are calculated on the basis of optimized  $S_0$  state. The higher energy levels of both singlet and triplet states were calculated using TD-B3LYP/6-31G(d, p) method on the basis of the optimized configuration of  $S_1$ . Natural transition orbitals (NTOs) involving both singlet and triplet states were evaluated to

investigate the properties of excited state.

## 2 Synthesis and Characterization

### 2. 1. 2-(4-(9,9-dimethyl-9H-fluoren-2-yl)phenyl)-1-phenyl-1H-phenanthro[9,10-d]imidazole (PPI-2-DMF)

A mixture of 2-bromo-9,9-dimethylfluorene (1.64 g, 6 mmol), PPIB (2.47 g, 5 mmol), Pd(PPh<sub>3</sub>)<sub>4</sub> (0.17 g, 0.15 mmol), K<sub>2</sub>CO<sub>3</sub> (5.52 g, 40 mmol), 20 mL distilled water, 40 mL toluene and were added to a 100 mL round flask and refluxed at 90 °C for 24 hours under nitrogen protection. Then the mixture was poured into water and extracted with dichloromethane for three times. After being collected and concentrated, the organic phase was then purified by column chromatography using petroleum ether/dichloromethane as eluent to finally afford white solid. <sup>1</sup>H NMR (500 MHz, DMSO-D<sub>6</sub>) δ (ppm): 8.95 (d, J = 8.2 Hz, 1H), 8.90 (d, J = 8.4 Hz, 1H), 8.74 (d, J = 6.9 Hz, 1H), 7.92 (dd, J = 11.7, 4.6 Hz, 2H), 7.87 (d, J = 6.6 Hz, 1H), 7.84 - 7.67 (m, 12H), 7.58 (dd, J = 8.6, 4.4 Hz, 2H), 7.39 - 7.32 (m, 3H), 7.10 (d, J = 8.0 Hz, 1H), 1.50 (s, 6H)

MS (MALDI-TOF), m/z: calcd for C<sub>42</sub>H<sub>30</sub>N<sub>2</sub>, 562.25; Found, 562.75 [M<sup>+</sup>]. Anal. Calcd for C<sub>42</sub>H<sub>30</sub>N<sub>2</sub>, C, 89.65; H, 5.37; N, 4.98 %; Found, C, 89.67, H, 5.39, N, 4.94%.

### 2. 2. 2-(4-(9,9-diphenyl-9H-fluoren-2-yl)phenyl)-1-phenyl-1H-phenanthro[9,10-d]imidazole (PPI-2-DPF)

A mixture of 2-bromo-9,9-diphenylfluorene (2.38 g, 6 mmol), PPIB (2.47 g, 5 mmol), Pd(PPh<sub>3</sub>)<sub>4</sub> (0.17 g, 0.15 mmol), K<sub>2</sub>CO<sub>3</sub> (5.52 g, 40 mmol), 20 mL distilled water, 40 mL toluene and were added to a 100 mL round flask and refluxed at 90 °C for 24 hours under nitrogen protection. Then the mixture was poured into water and extracted with dichloromethane for three times. After being collected and concentrated, the organic phase was then purified by column chromatography using petroleum ether/dichloromethane as eluent to finally afford white solid. <sup>1</sup>H NMR (500 MHz, DMSO-D<sub>6</sub>) δ (ppm): 8.94 (d, J = 8.3 Hz, 1H), 8.88 (s, 1H), 8.71 (d, J = 8.0 Hz, 1H),

8.04 (d, J = 8.0 Hz, 2H), 7.99 (s, 1H), 7.82 - 7.68 (m, 8H), 7.66 (s, 3H), 7.56 (d, J = 7.1 Hz, 2H), 7.44 (t, J = 8.1 Hz, 2H), 7.37 - 7.33 (m, 2H), 7.26 (dd, J = 17.1, 7.4 Hz, 5H), 7.19 (d, J = 7.0 Hz, 4H), 7.08 (d, J = 7.7 Hz, 2H). MS (MALDI-TOF), m/z: calcd for C<sub>52</sub>H<sub>34</sub>N<sub>2</sub>, 686.72; Found, 686.68 [M<sup>+</sup>]. Anal. Calcd for C<sub>52</sub>H<sub>34</sub>N<sub>2</sub>, C, 90.93; H, 4.99; N, 4.08 %; Found, C, 90.91, H, 4.99, N, 4.10%.

2. 3. 2-(4-(9,9'-spirobi[fluorene]-3-yl)phenyl)-1-phenyl-1H-phenanthro[9,10-d]imidazole (PPI-3-SBF)

A mixture of 3-bromo-9,9'-spirobi[fluorene] (2.37 g, 6 mmol), PPIB (2.47 g, 5 mmol), Pd(PPh<sub>3</sub>)<sub>4</sub> (0.17 g, 0.15 mmol), K<sub>2</sub>CO<sub>3</sub> (5.52 g, 40 mmol), 20 mL distilled water, 40 mL toluene and were added to a 100 mL round flask and refluxed at 90 °C for 24 hours under nitrogen protection. Then the mixture was poured into water and extracted with dichloromethane for three times. After being collected and concentrated, the organic phase was then purified by column chromatography using petroleum ether/dichloromethane as eluent to finally afford white solid. <sup>1</sup>H NMR (500 MHz, DMSO-D<sub>6</sub>) δ (ppm): 8.96 (d, J = 8.1 Hz, 1H), 8.90 (d, J = 8.2 Hz, 1H), 8.74 (d, J = 8.0 Hz, 1H), 8.41 (s, 1H), 8.17 (d, J = 7.6 Hz, 2H), 8.04 (d, J = 7.7 Hz, 2H), 7.75 (ddd, J = 31.0, 15.7, 7.5 Hz, 7H), 7.62 - 7.55 (m, 2H), 7.51 - 7.39 (m, 4H), 7.39 - 7.33 (m, 2H), 7.17 (dd, J = 14.2, 6.7 Hz, 3H), 7.10 (d, J = 7.8 Hz, 2H), 6.71 - 6.61 (m, 4H). MS (MALDI-TOF), m/z: calcd for C<sub>52</sub>H<sub>32</sub>N<sub>2</sub>, 684.26; Found, 684.84 [M<sup>+</sup>]. Anal. Calcd for C<sub>52</sub>H<sub>32</sub>N<sub>2</sub>, C, 91.20; H, 4.71; N, 4.09 %; Found, C, 91.19, H, 4.73, N, 4.08%.

PPI-2-DMF

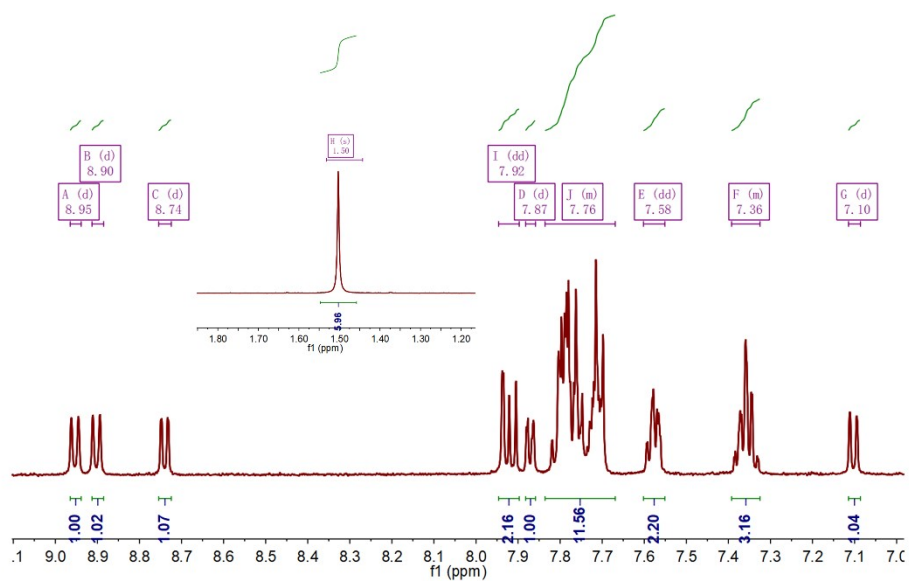

Fig S1. <sup>1</sup>H NMR spectra of PPI-2-DMF measured in deuterated DMSO-D<sub>6</sub>.

PPI-2-DPF

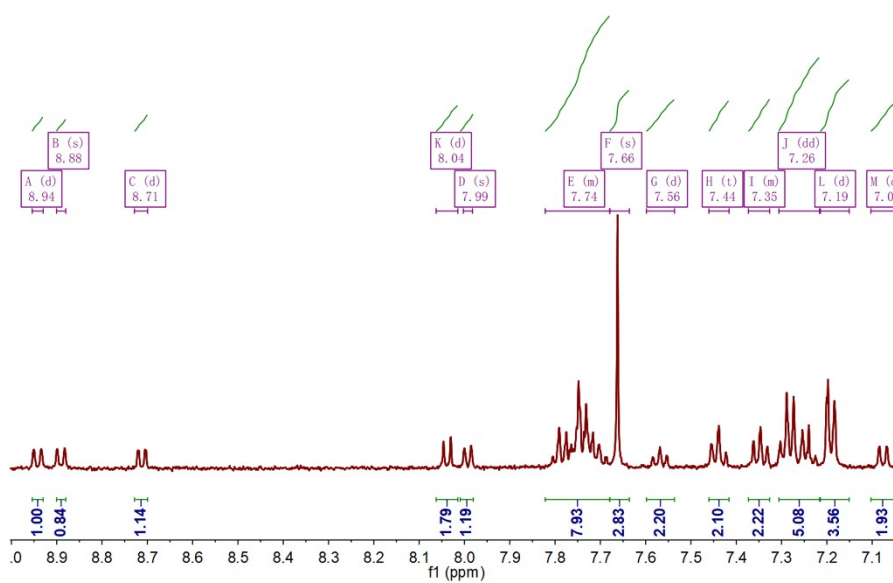

Fig S2. <sup>1</sup>H NMR spectra of PPI-2-DPF measured in deuterated DMSO-D<sub>6</sub>.



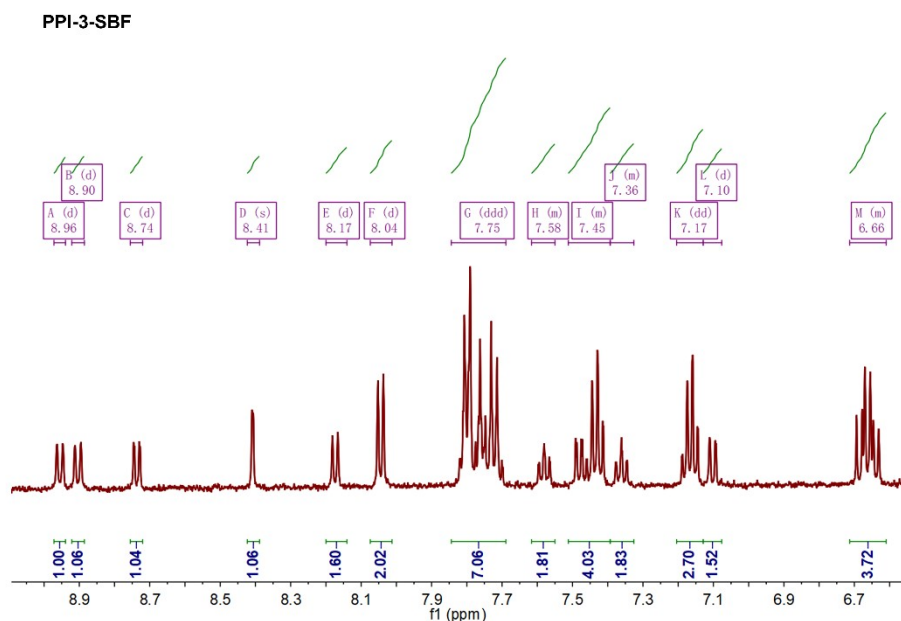

Fig S3.  $^1\text{H}$  NMR spectra of PPI-3-SBF measured in deuterated  $\text{DMSO-D}_6$ .

### 3. Single crystal X-ray diffraction

**Table S1.** Structural data of PPI-2-DMF, PPI-2-DPF and PPI-3-SBF.

| compound            | PPI-2-DMF                              | PPI-2-DPF                              | PPI-3-SBF                              |
|---------------------|----------------------------------------|----------------------------------------|----------------------------------------|
| CCDC number         | 2167068                                | 2167071                                | 2167072                                |
| empirical formula   | $\text{C}_{42}\text{H}_{30}\text{N}_2$ | $\text{C}_{52}\text{H}_{34}\text{N}_2$ | $\text{C}_{52}\text{H}_{32}\text{N}_2$ |
| formula weight      | 562.68                                 | 686.81                                 | 684.79                                 |
| T [K]               | 293                                    | 100                                    | 100                                    |
| crystal system      | triclinic                              | monoclinic                             | monoclinic                             |
| space group         | P-1                                    | P21/c                                  | P21/n                                  |
| a [Å]               | 8.635 (4)                              | 10.3788 (3)                            | 12.9124 (5)                            |
| b [Å]               | 9.812 (4)                              | 10.8825 (4)                            | 9.4122 (3)                             |
| c [Å]               | 35.662 (15)                            | 32.3122 (12)                           | 29.9390 (11)                           |
| $\alpha$ [°]        | 91.797 (15)                            | 90                                     | 90                                     |
| $\beta$ [°]         | 93.504 (17)                            | 92.934 (1)                             | 93.272 (1)                             |
| $\gamma$ [°]        | 90.533 (15)                            | 90                                     | 90                                     |
| V [Å <sup>3</sup> ] | 3014 (2)                               | 3644.8 (2)                             | 3632.7 (2)                             |

|                                            |        |        |        |
|--------------------------------------------|--------|--------|--------|
| Z                                          | 4      | 4      | 4      |
| F(000)                                     | 1184   | 1440   | 1432   |
| density [g/cm <sup>3</sup> ]               | 1.240  | 1.252  | 1.252  |
| $\mu$ [mm <sup>-1</sup> ]                  | 0.072  | 0.072  | 0.072  |
| Reflections collected                      | 13804  | 8367   | 8338   |
| unique reflections                         | 7704   | 6027   | 1.059  |
| GOF                                        | 1.033  | 1.052  | 0.1015 |
| R <sub>1</sub> [I>2 $\sigma$ (I)]          | 0.0498 | 0.0541 | 0.0768 |
| $\omega$ R <sub>2</sub> [I>2 $\sigma$ (I)] | 0.1141 | 0.1262 | 0.1280 |
| R <sub>1</sub> (all data)                  | 0.1154 | 0.0813 | 1.059  |
| $\omega$ R <sub>2</sub> (all data)         | 0.1514 | 0.1454 | 0.0441 |

#### 4. Theoretical calculations

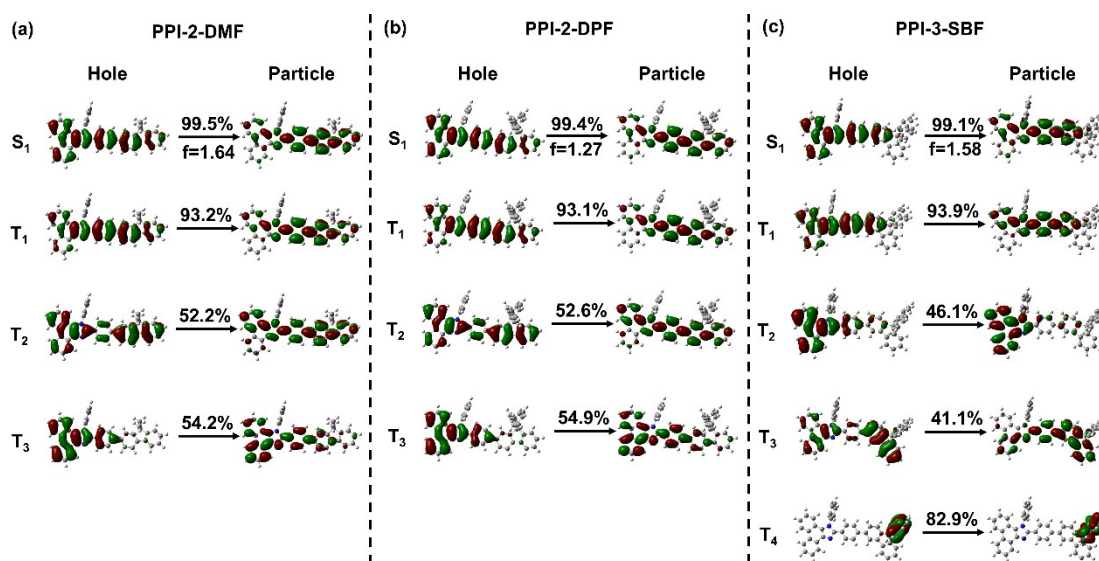

Fig S4. NTO for S<sub>1</sub>/S<sub>0</sub> transition in PPI-2-DMF, PPI-2-DPF and PPI-3-SBF. Herein, f represents for the oscillator strength, and the percentage weights of hole-particle are given for the S<sub>1</sub>/S<sub>0</sub> emission.

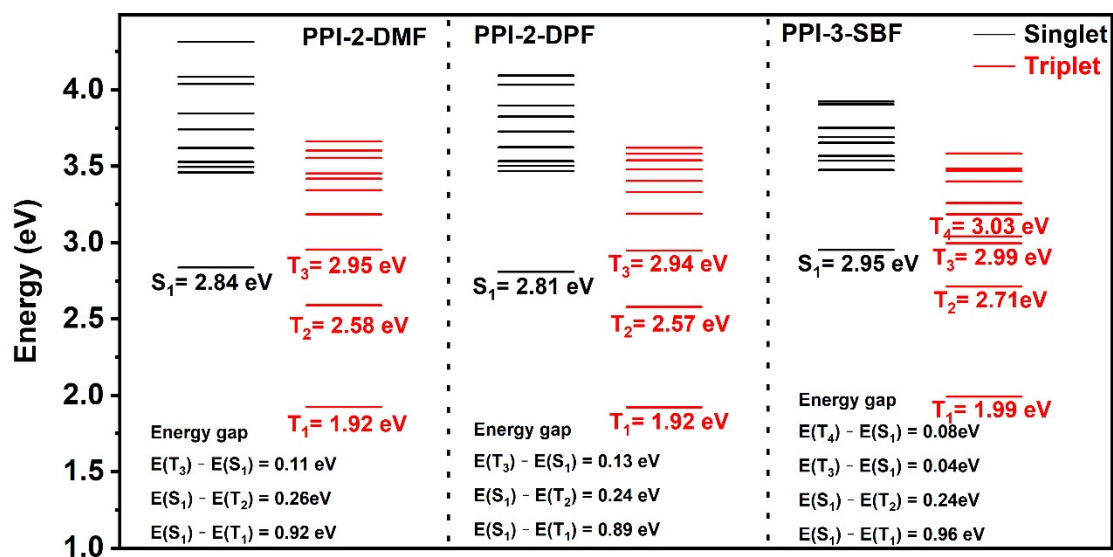

Fig S5. The energy diagram of the first ten singlet and triplet excited states of PPI-2-DMF, PPI-2-DPF and PPI-3-SBF.

## 5. Photophysical Properties

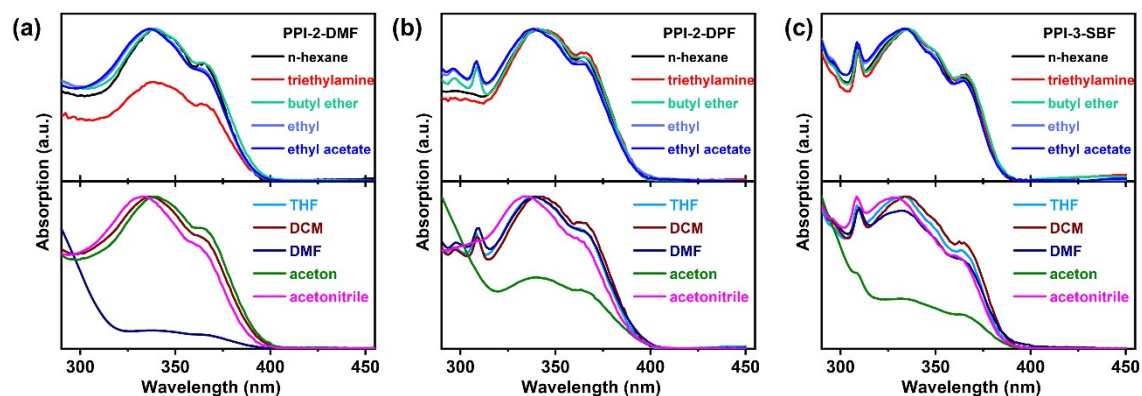

Fig S6. Solvation effects on absorption spectra of (a) PPI-2-DMF, (b) PPI-2-DPF and (c) PPI-3-SBF.

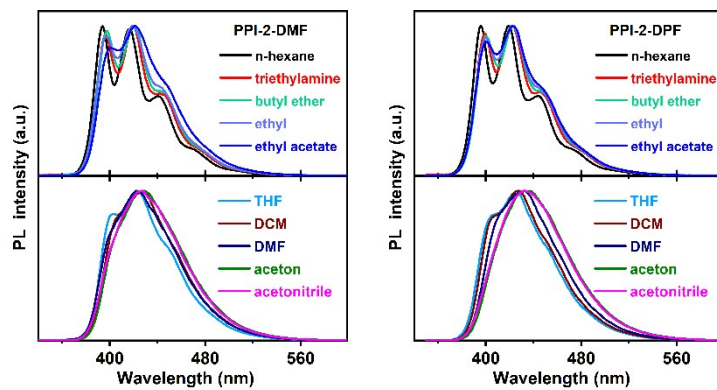

Fig S7. Solvation effects on emission spectra of PPI-2-DMF and PPI-2-DPF .

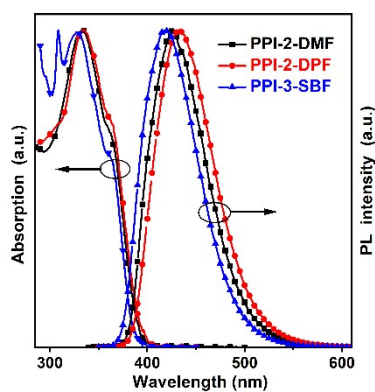

Fig S8. Absorption and PL spectra of the PPI-2-DMF, PPI-2-DPF and PPI-3-SBF in acetonitrile solution ( $10^{-5}$  M).

Table S2. Detailed photophysical data of PPI-2-DMF in different solvents.

| Solvents           | f ( $\epsilon$ , n) | $\Phi_F$ | PPI-2-DMF                   |                            |                                   |
|--------------------|---------------------|----------|-----------------------------|----------------------------|-----------------------------------|
|                    |                     |          | $\lambda_{\text{abs}}$ (nm) | $\lambda_{\text{em}}$ (nm) | $\nu_a-\nu_f$ (cm <sup>-1</sup> ) |
| Hexane             | ~ 0                 | 86       | 339                         | 393                        | 4053                              |
| Triethylamine      | 0.048               | 46       | 339                         | 396                        | 4245                              |
| Butyl ether        | 0.096               | 66       | 338                         | 397                        | 4396                              |
| Ethyl ether        | 0.167               | 74       | 338                         | 421                        | 5719                              |
| Ethyl acetate      | 0.200               | 77       | 337                         | 422                        | 5807                              |
| Tetrahydrofuran    | 0.210               | 70       | 337                         | 425                        | 5864                              |
| Methylene chloride | 0.217               | 77       | 336                         | 426                        | 6287                              |
| Dimethyl formamide | 0.276               | 65       | 335                         | 430                        | 6210                              |
| Acetone            | 0.284               | 39       | 334                         | 433                        | 6465                              |
| Acetonitrile       | 0.305               | 84       | 332                         | 433                        | 6591                              |

f: the orientational polarizability of the solvent;  $\lambda_a$ : absorption maximum;  $\lambda_f$ : emission maximum;  $\nu_a-\nu_f$ : the Stokes shifts.

Table S3. Detailed photophysical data of PPI-2-DPF in different solvents.

| Solvents           | f ( $\epsilon$ , n) | $\Phi_F$ | PPI-2-DPF                   |                            |                                   |
|--------------------|---------------------|----------|-----------------------------|----------------------------|-----------------------------------|
|                    |                     |          | $\lambda_{\text{abs}}$ (nm) | $\lambda_{\text{em}}$ (nm) | $\nu_a-\nu_f$ (cm <sup>-1</sup> ) |
| Hexane             | ~ 0                 | 74       | 339                         | 395                        | 4182                              |
| Triethylamine      | 0.048               | 37       | 339                         | 395                        | 4182                              |
| Butyl ether        | 0.096               | 78       | 339                         | 400                        | 4498                              |
| Ethyl ether        | 0.167               | 83       | 338                         | 407                        | 5015                              |
| Ethyl acetate      | 0.200               | 83       | 338                         | 410                        | 5195                              |
| Tetrahydrofuran    | 0.210               | 76       | 337                         | 413                        | 5460                              |
| Methylene chloride | 0.217               | 77       | 337                         | 418                        | 5750                              |
| Dimethyl formamide | 0.276               | 78       | 336                         | 421                        | 6008                              |
| Acetone            | 0.284               | 45       | 334                         | 417                        | 5959                              |
| Acetonitrile       | 0.305               | 80       | 332                         | 422                        | 6423                              |

f: the orientational polarizability of the solvent;  $\lambda_a$ : absorption maximum;  $\lambda_f$ : emission maximum;  $\nu_a-\nu_f$ : the Stokes shifts.

| Solvents           | f ( $\epsilon, n$ ) | $\Phi_F$ | PPI-3-SBF            |                     |                                   |
|--------------------|---------------------|----------|----------------------|---------------------|-----------------------------------|
|                    |                     |          | $\lambda_{abs}$ (nm) | $\lambda_{em}$ (nm) | $\nu_a-\nu_f$ (cm <sup>-1</sup> ) |
| Hexane             | $\sim 0$            | 77       | 336                  | 385                 | 3787                              |
| Triethylamine      | 0.048               | 46       | 335                  | 387                 | 4010                              |
| Butyl ether        | 0.096               | 80       | 334                  | 388                 | 4166                              |
| Ethyl ether        | 0.167               | 88       | 333                  | 409                 | 5580                              |
| Ethyl acetate      | 0.200               | 72       | 333                  | 410                 | 5639                              |
| Tetrahydrofuran    | 0.210               | 73       | 333                  | 411                 | 5699                              |
| Methylene chloride | 0.217               | 71       | 331                  | 413                 | 5998                              |
| Dimethyl formamide | 0.276               | 79       | 330                  | 418                 | 6379                              |
| Acetone            | 0.284               | 43       | 328                  | 418                 | 6564                              |
| Acetonitrile       | 0.305               | 77       | 328                  | 419                 | 6621                              |

Table S4. Detailed photophysical data of PPI-3-SBF in different solvents.

f: the orientational polarizability of the solvent;  $\lambda_a$ : absorption maximum;  $\lambda_f$ : emission maximum;  $\nu_a-\nu_f$ : the Stokes shifts.

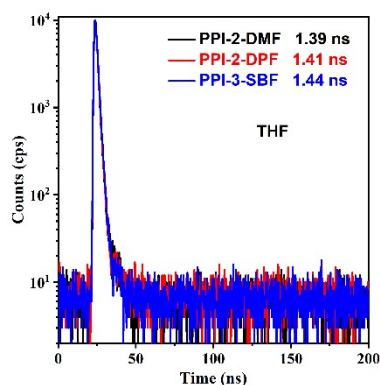

Fig S9. Transient PL decay spectra of PPI-2-DMF, PPI-2-DPF and PPI-3-SBF in THF solutions ( $10^{-5}$  M).

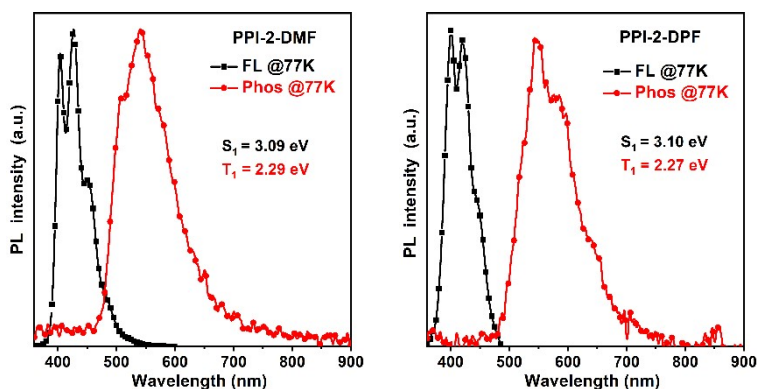

Fig S10. Low-temperature fluorescence and phosphorescence spectra at 77K of PPI-2-DMF and

PPI-2-DPF were measured in frozen toluene matrix.

## 6. Electrochemical properties

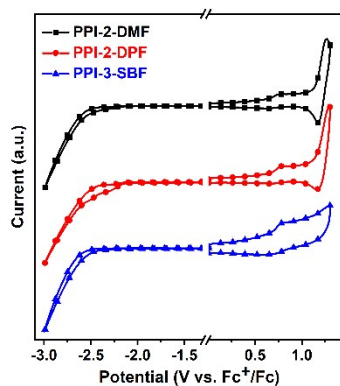

Fig S11. Cyclic voltammograms (CV) curves of PPI-2-DMF, PPI-2-DPF and PPI-3-SBF.

## 7. Electroluminescent properties

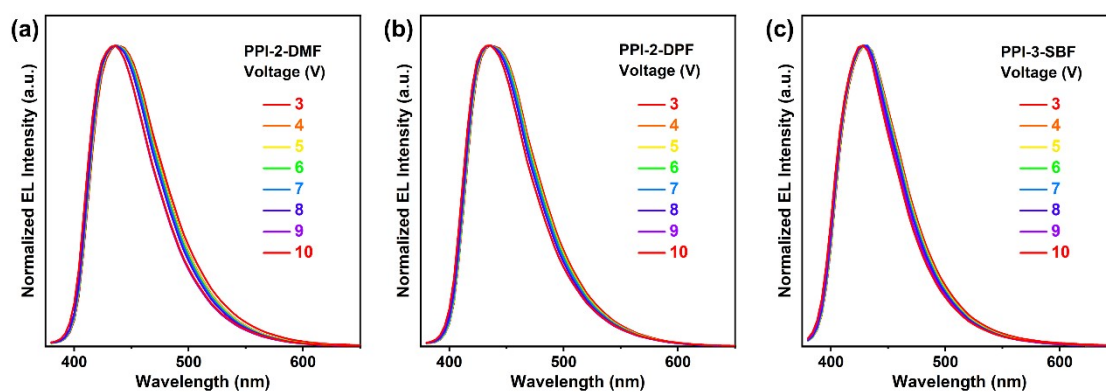

Fig S12. Normalized EL spectra of (a) PPI-2-DMF, (b) PPI-2-DPF and (c) PPI-3-SBF at different voltages.

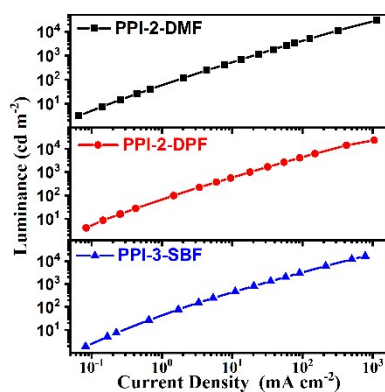

Fig S13. Current density-luminance curves of devices based on PPI-2-DMF, PPI-2-DPF and PPI-3-SBF

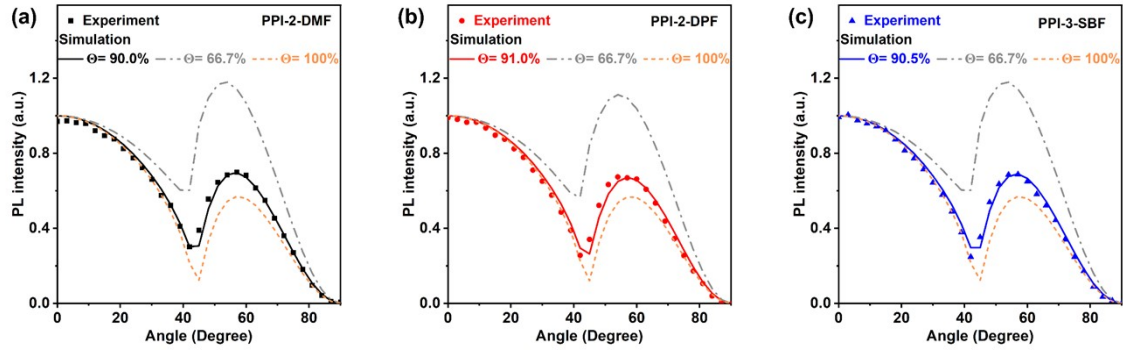

Fig S14. P-polarized PL spectra and estimated  $\Theta_{//}$  values of (a) PPI-2-DMF, (b) PPI-2-DPF and (c) PPI-3-SBF neat films.

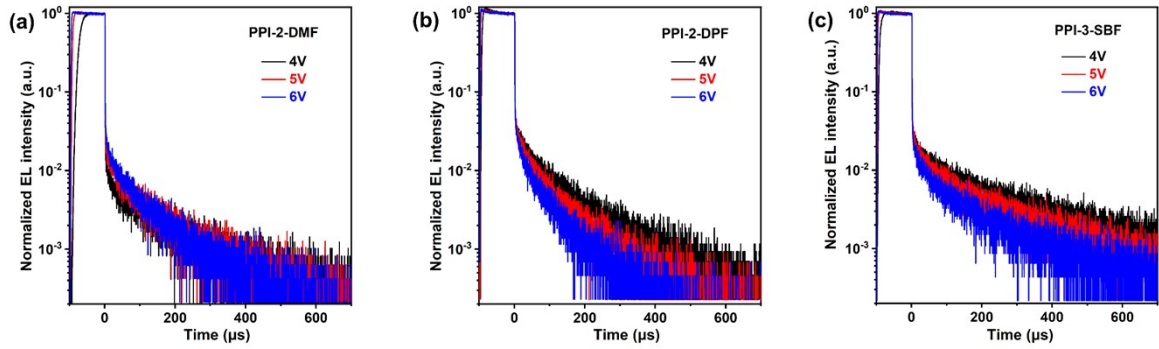

Fig S15. Transient EL decay of (a) PPI-2-DMF, (b) PPI-2-DPF and (c) PPI-3-SBF non-doped device at different voltages.

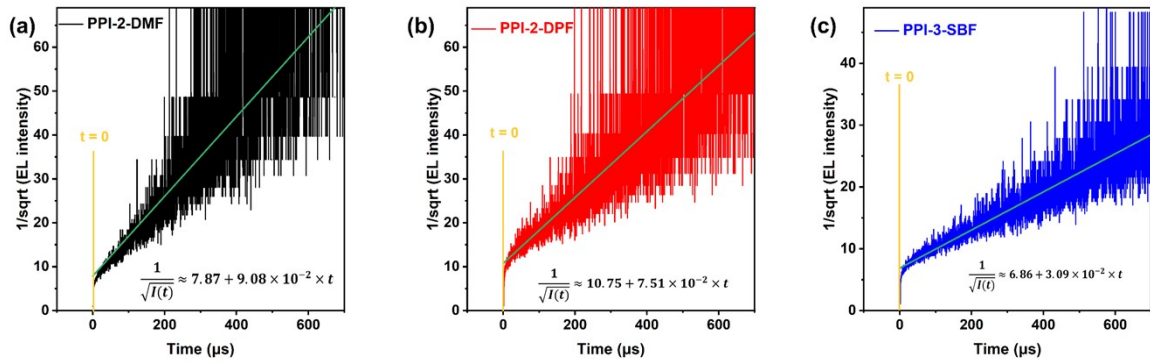

Fig S16. Inverse square root of transient EL intensity as a function of linear-scaled time.

Table S5. Recent representative high-efficiency non-doped deep blue fluorescent OLEDs with  $\text{CIE}_y \leq 0.08$ .

| device    | $V_{\text{on}}^a$<br>(V) | $L_{\text{max}}^b$<br>( $\text{cd m}^{-2}$ ) | $\text{CE}_{\text{max}}^c$<br>( $\text{cd A}^{-1}$ ) | $\text{PE}_{\text{max}}^d$<br>( $\text{lm W}^{-1}$ ) | $\text{EQE}^e$<br>(%) | $\lambda_{\text{EL}}/\text{FWHM}^f$<br>(nm) | $\text{CIE}^g$<br>(x, y) | Ref.      |
|-----------|--------------------------|----------------------------------------------|------------------------------------------------------|------------------------------------------------------|-----------------------|---------------------------------------------|--------------------------|-----------|
| PPI-2-DMF | 2.9                      | 30145                                        | 5.94                                                 | 5.78                                                 | 7.57/6.37<br>Max/1000 | 434/70                                      | (0.16, 0.09)             | This work |



|                    |      |       |      |      |           |        |                |           |
|--------------------|------|-------|------|------|-----------|--------|----------------|-----------|
| PPI-2-DPF          | 2.9  | 23170 | 6.77 | 6.24 | 8.48/7.02 | 434/68 | (0.16, 0.09)   | This work |
| PPI-3-SBF          | 3.0  | 16365 | 4.72 | 3.69 | 8.41/6.77 | 428/60 | (0.16, 0.07)   | This work |
| 2BuCz-CNCz (N)     | 3.6  | 2625  | 1.67 | 1.45 | 5.24/4.81 | 408/62 | (0.157,0.050)  | 1         |
| POPCN-2CP (N)      | 3.5  | 4290  | --   | --   | 7.5/6.1   | 404/52 | (0.159, 0.035) | 2         |
| 2Na-CzCN (N)       | 3.7  | 4759  | 1.83 | 1.12 | 5.92/5.91 | 398/53 | (0.15, 0.06)   | 3         |
| mTPA-PPI (N)       | 3.2  | 4065  | 0.84 | 0.48 | 3.33/--   | 404/47 | (0.161, 0.049) | 4         |
| 4-PPI-SBF          | 2.75 | 8951  | 2.30 | 2.02 | 5.29/--   | 424/-- | (0.155, 0.058) | 5         |
| CSiTPI (N)         | 3.2  | 2445  | 1.39 | 1.38 | 7.1/--    | 404/45 | (0.16, 0.06)   | 6         |
| TPINCz (N)         | 3.1  | --    | 5.00 | 5.15 | 5.95/--   | 448/-- | (0.157, 0.084) | 7         |
| IPD-MP-DPA (N)     | 2.9  | 4158  | 2.4  | 2.5  | 4.4/--    | 428/56 | (0.154,0.078)  | 8         |
| 2M-ph-pCzAnBzt (N) | 3.4  | 3085  | 5.95 | 5.43 | 10.44/--  | 450/-- | (0.151, 0.057) | 9         |
| TPA-PI-SBF (N)     | 3.1  | 4901  | 3.61 | 3.50 | 6.76/6.71 | 448/59 | (0.152, 0.059) | 10        |
| TPBPPI-PBI (N)     | 3.9  | --    | 3.22 | 2.71 | 5.94/--   | 429/-- | (0.160, 0.059) | 11        |
| PIpPI (N)          | 3.0  | 17560 | 5.33 | 5.31 | 8.84/7.70 | 428/-- | (0.15, 0.07)   | 12        |
| 2FPPI-TPA (N)      | 2.8  | 3798  | 6.47 | 7.00 | 8.47/6.90 | 440/-- | (0.152, 0.083) | 13        |
| PPI-2TPA (N)       | 3.0  | 14850 | 4.40 | 4.60 | 7.20/--   | 440/59 | (0.150, 0.063) | 14        |
| 9-PCZCFOXZ(N)      | 3.2  | 5740  | 4.1  | 2.9  | 7.2/5.0   | 417/-- | (0.153, 0.075) | 15        |
| SP (N)             | 3.0  | 13488 | 6.9  | 7.5  | 11.3/7.0  | 436/-- | (0.158, 0.068) | 16        |

<sup>a</sup>V<sub>on</sub>: turn-on voltage at the luminescence of 1 cd m<sup>-2</sup>; <sup>b</sup>L<sub>max</sub>: maximum luminance; <sup>c</sup>CE<sub>max</sub>: maximum current efficiency; <sup>d</sup>PE<sub>max</sub>: maximum power efficiency; <sup>e</sup>EQE max/1000: EQE of maximum /1000 cd m<sup>-2</sup>; <sup>f</sup>λ<sub>EL</sub>/FWHM: emission peak and full widths at half maximum of EL spectrum; <sup>g</sup>CIE: Commission International de l'Éclairage (CIE) coordinates.

## References:

1. H. Zhang, G. Li, X. Guo, K. Zhang, B. Zhang, X. Guo, Y. Li, J. Fan, Z. Wang, D. Ma and B. Z. Tang, *Angew. Chem. Int. Ed.*, 2021, 60, 22241-22247.
2. J. Chen, H. Liu, J. Guo, J. Wang, N. Qiu, S. Xiao, J. Chi, D. Yang, D. Ma, Z. Zhao and B. Z. Tang, *Angew. Chem. Int. Ed.*, 2022, 61, e202116810.
3. G. Li, B. Li, H. Zhang, X. Guo, C. Lin, K. Chen, Z. Wang, D. Ma and B. Z. Tang, *ACS Appl. Mater. Interfaces*, 2022, 14, 10627-10636.
4. H. Liu, Q. Bai, L. Yao, H. Zhang, H. Xu, S. Zhang, W. Li, Y. Gao, J. Li, P. Lu, H. Wang, B. Yang and Y. Ma, *Chem. Sci.*, 2015, 6, 3797-3804.
5. Z.-Y. Wang, J.-W. Zhao, B. Liu, C. Cao, P. Li, Q.-X. Tong and S.-L. Tao, *Dyes Pigm.*, 2019, 163, 213-220.
6. Y. Zheng, X. Zhu, Z. Ni, X. Wang, Z. Zhong, X. J. Feng, Z. Zhao and H. Lu, *Adv. Opt. Mater.*, 2021, 9, 2100965.

7. W.-C. Chen, Y. Yuan, S.-F. Ni, Q.-X. Tong, F.-L. Wong and C.-S. Lee, *Chem. Sci.*, 2017, 8, 3599-3608.
8. J. Xu, H. Liu, J. Li, Z. Zhao and B. Z. Tang, *Adv. Opt. Mater.*, 2021, 9, 2001840.
9. R. Guo, W. Liu, S. Ying, Y. Xu, Y. Wen, Y. Wang, D. Hu, X. Qiao, B. Yang, D. Ma and L. Wang, *Sci. Bull.*, 2021, 66, 2090-2098.
10. S.-S. Tang, G.-X. Yang, J.-J. Zhu, X. He, J.-X. Jian, F. Lu and Q.-X. Tong, *Chem. Eur. J.*, 2021, 27, 9102-9111.
11. J.-J. Zhu, W.-C. Chen, Y. Yuan, D. Luo, Z.-L. Zhu, X. Chen, J.-X. Chen, C.-S. Lee and Q.-X. Tong, *Dyes Pigm.*, 2020, 173, 107982.
12. Z. Li, C. Li, Y. Xu, N. Xie, X. Jiao and Y. Wang, *J. Phys. Chem. Lett.*, 2019, 10, 842-847.
13. Z. Li, N. Xie, Y. Xu, C. Li, X. Mu and Y. Wang, *Org. Mater.*, 2020, 02, 011-019.
14. B. Liu, Z.-W. Yu, D. He, Z.-L. Zhu, J. Zheng, Y.-D. Yu, W.-F. Xie, Q.-X. Tong and C.-S. Lee, *J. Mater. Chem. C*, 2017, 5, 5402-5410.
15. R. Wang, T. Li, C. Liu, M. Xie, H. Zhou, Q. Sun, B. Yang, S.-T. Zhang, S. Xue and W. Yang, *Adv. Funct. Mater.*, 2022, 32, 2201143.
16. S. Xiao, Y. Gao, R. Wang, H. Liu, W. Li, C. Zhou, S. Xue, S.-T. Zhang, B. Yang and Y. Ma, *Chem. Eng. J.*, 2022, 440, 135911.
